# Supplementary material for: Electron transfer kinetics in water splitting dye-sensitized solar cells based on core–shell oxide electrodes
Source: Royal Society of Chemistry journal article supplement (doi:10.1039/c1fd00083g), 2011-07-07
Supplement: c1fd00083g.pdf [file c1fd00083g.pdf]

Supplementary Information for:

**Electron transfer kinetics in water splitting dye-sensitized solar cells  
based on core-shell oxide electrodes**

Seung-Hyun Anna Lee, Yixin Zhao, Emil A. Hernandez-Pagan, Landy Blasdel,  
W. Justin Youngblood, and Thomas E. Mallouk\*

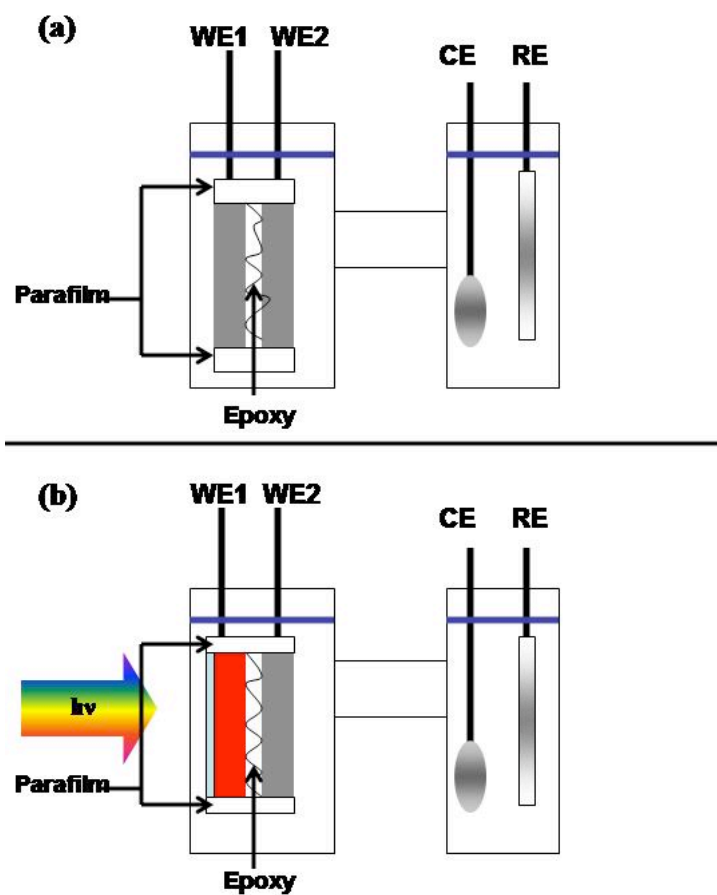

**Fig. S1.** Experimental setup for amperometric detection of photoelectrochemically generated oxygen. (a) Calibration of the collection efficiency using Pt generator (WE1) and collector electrodes (WE2). The cell was purged with Ar for 20-30 min. prior to calibration and testing. The counterelectrode (CE) and reference electrode (RE) were Pt mesh and Ag/AgCl, respectively. (b) Test configuration using a dye sensitized TiO<sub>2</sub> or core-shell oxide/TiO<sub>2</sub> photoanode on FTO glass.

Supplementary Material (ESI) for Faraday Discussions  
This journal is © The Royal Society of Chemistry 2011

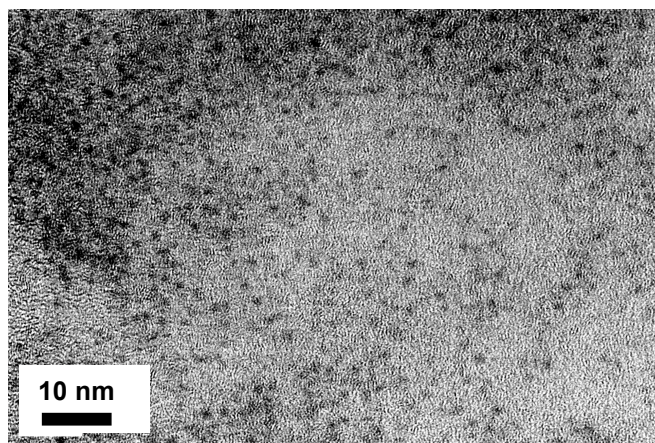

**Fig. S2.** HRTEM image of iridium oxide nanoparticles capped with sensitizer **1**.

Supplementary Material (ESI) for Faraday Discussions  
This journal is © The Royal Society of Chemistry 2011

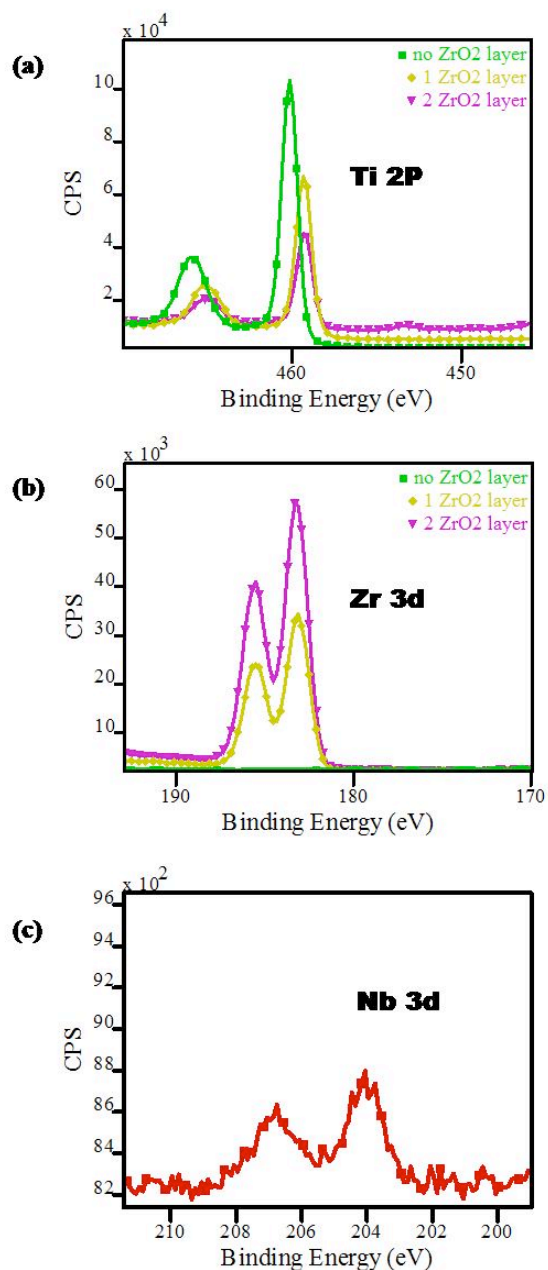

**Fig. S3.** X-ray photoelectron spectra (XPS) of  $\text{TiO}_2$  and core-shell  $\text{TiO}_2/\text{ZrO}_2$  and  $\text{TiO}_2/\text{Nb}_2\text{O}_5$  oxide films. The sample was prepared for XPS by mechanically scraping the oxide film off the electrode surface.
